# Supplementary material
Source: Springer Nature journal article supplement (https://www.springermedizin.de/resource/supplementary/13550_2013_195_MOESM3_ESM.pdf/9687784)

**A** **$^{111}\text{In}$ -Fab**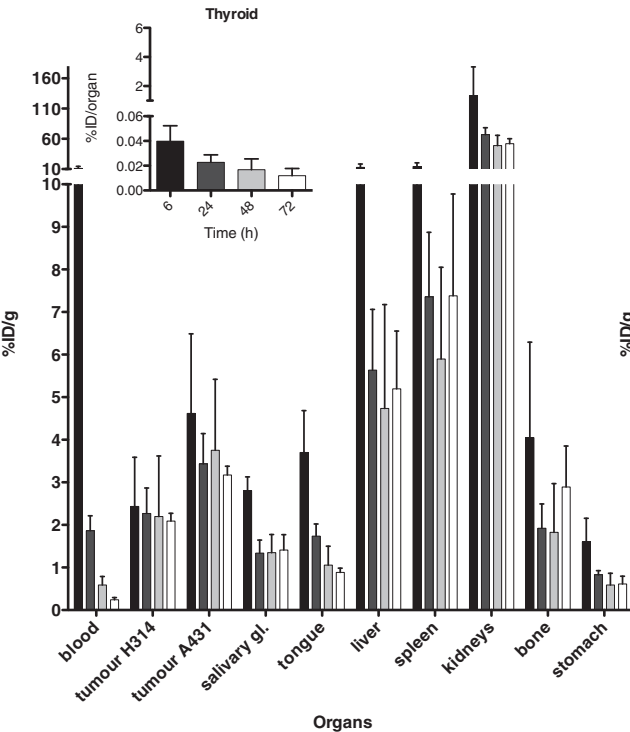**B** **$^{125}\text{I}$ -Fab**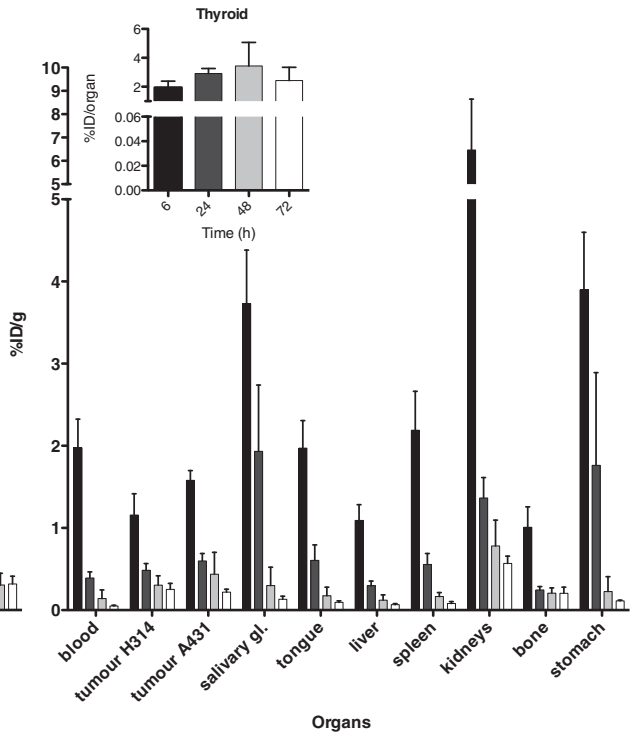

Supplement: MOESM3 [file 9687784]
